# Supplementary material for: Concomitant emergence of circularly polarized luminescence and single-molecule magnet behavior in chiral-at-metal Dy complex
Source: Royal Society of Chemistry journal article supplement (doi:10.1039/d0qi00919a), 2020-01-01

## SUPPORTING INFORMATION

# Concomitant Emergence of Circularly Polarized Luminescence and Single-Molecule Magnet Behavior in Chiral-at-Metal Dy Complex

Bahjat El Rez,<sup>a</sup> Jiawen Liu,<sup>c</sup> Virginie Béreau,<sup>a,b</sup> Carine Duhayon,<sup>a</sup> Yuki Horino,<sup>d</sup> Takayoshi Suzuki,<sup>d,e</sup> Laurent Coolen,<sup>\*,c</sup> Jean-Pascal Sutter<sup>\*,a</sup>

<sup>a</sup> Laboratoire de Chimie de Coordination du CNRS (LCC-CNRS), Université de Toulouse, CNRS, Toulouse, France  
[sutter@lcc-toulouse.fr](mailto:sutter@lcc-toulouse.fr)

<sup>b</sup> Université de Toulouse, Institut Universitaire de Technologie-Département de Chimie, Castres, France

<sup>c</sup> Sorbonne Université, CNRS, Institut de NanoSciences de Paris, INSP, F-75005 Paris, France  
[coolen@insp.jussieu.fr](mailto:coolen@insp.jussieu.fr)

<sup>d</sup> Graduate School of Natural Science and Technology, Okayama University, Okayama 700-8530, Japan.

<sup>e</sup> Research Institute for Interdisciplinary Science (RIIS), Okayama University, Okayama 700-8530, Japan

## CONTENTS

|                    |                                                                                                                                                                                                                                |     |
|--------------------|--------------------------------------------------------------------------------------------------------------------------------------------------------------------------------------------------------------------------------|-----|
| <b>Picture 1.</b>  | Crystals of [L <sup>Me2</sup> Zn(Cl)Dy((-)-camph) <sub>2</sub> (MeOH)], $\Delta$ -Dy.                                                                                                                                          | S2  |
| <b>Table S1.</b>   | Crystal data for $\Lambda$ -Dy and $\Delta$ -Dy.                                                                                                                                                                               | S2  |
| <b>Figure S1.</b>  | Asymmetric units for $\Lambda$ -Dy and $\Delta$ -Dy with numbering scheme.                                                                                                                                                     | S3  |
| <b>Figure S2.</b>  | $\Lambda$ -Eu : ORTEP plot (with ellipsoids at the 50% level of probability) of the asymmetric unit with numbering scheme.                                                                                                     | S4  |
| <b>Figure S3</b>   | $\Lambda$ -Dy/Y : ORTEP plot (with ellipsoids at the 50% level of probability) of the asymmetric unit with numbering scheme.                                                                                                   | S4  |
| <b>Table S2.</b>   | Selected bond distances (Å) and angles (°) for Eu and Dy complexes                                                                                                                                                             | S5  |
| <b>Table S3.</b>   | SHAPE Analysis for the ML9 coordination sphere of the Ln ions.                                                                                                                                                                 | S6  |
| <b>Figure S4.</b>  | Solid-state UV-vis spectra for ZnL <sup>Me2</sup> and [L <sup>Me2</sup> Zn(Cl)Dy((+/-)-camph) <sub>2</sub> (MeOH)] complexes                                                                                                   | S6  |
| <b>Figure S5.</b>  | Magnetic behaviors for $\Lambda$ -Dy and $\Delta$ -Dy.                                                                                                                                                                         | S7  |
| <b>Figure S6.</b>  | Magnetic behaviors for [L <sup>Me2</sup> Zn(Cl)Y/Dy((+)-camph) <sub>2</sub> (MeOH)], $\Lambda$ -Dy/Y.                                                                                                                          | S9  |
| <b>Picture 2.</b>  | Crystals (size 300-800 $\mu$ m) and powders (crushed crystal) on the cold stage for micro-photoluminescence studies.                                                                                                           | S10 |
| <b>Figure S7.</b>  | Temperature dependent emission and $g_{lum}$ of a $\Delta$ -Dy crystal.                                                                                                                                                        | S10 |
| <b>Figure S8.</b>  | Temperature dependent emission and $g_{lum}$ for a $\Lambda$ -Eu and a $\Delta$ -Eu crystal.                                                                                                                                   | S11 |
| <b>Figure S9.</b>  | Angular distribution of the emission (bands at 573-nm and 663-nm) recorded at 5K, and temperature dependent variation of degree of circular polarization for a crystalline powder of $\Lambda$ -Dy and a $\Delta$ -Dy crystal. | S12 |
| <b>Figure S10.</b> | X-Ray Powder Diffraction (XRPD) for $\Lambda$ -Dy, $\Delta$ -Dy, $\Lambda$ -Eu, and $\Delta$ -Eu.                                                                                                                              | S13 |

**Picture 1.** Crystals of  $[L^{Me_2Zn(Cl)Dy}((-)-camph)_2(MeOH)]$ ,  $\Delta$ -Dy.

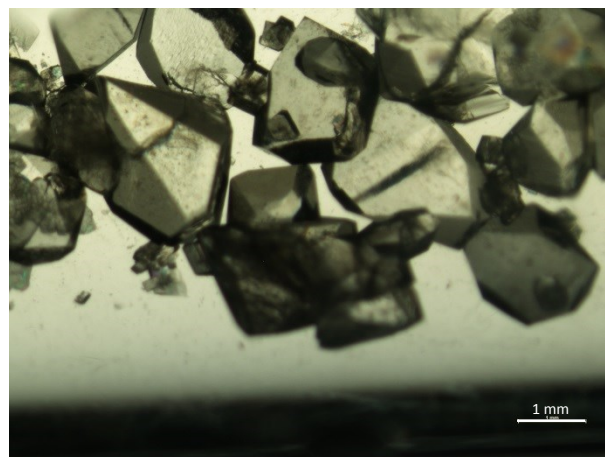

**Table S1.** Crystal data for  $\Lambda$ -Dy,  $\Delta$ -Dy,  $\Lambda$ -Eu, and  $\Lambda$ -Dy/Y.

| Compound                                                             | $\Lambda$ -Dy                                                                          | $\Delta$ -Dy                                                                           | $\Lambda$ -Eu                                                                          | $\Lambda$ -Dy/Y                                                                                                           |
|----------------------------------------------------------------------|----------------------------------------------------------------------------------------|----------------------------------------------------------------------------------------|----------------------------------------------------------------------------------------|---------------------------------------------------------------------------------------------------------------------------|
| Empirical formula                                                    | C <sub>46</sub> H <sub>56</sub> ClDyF <sub>6</sub><br>N <sub>2</sub> O <sub>9</sub> Zn | C <sub>46</sub> H <sub>56</sub> ClDyF <sub>6</sub><br>N <sub>2</sub> O <sub>9</sub> Zn | C <sub>46</sub> H <sub>56</sub> ClEuF <sub>6</sub><br>N <sub>2</sub> O <sub>9</sub> Zn | C <sub>46</sub> H <sub>56</sub> ClDy <sub>0.16</sub><br>F <sub>6</sub> N <sub>2</sub> O <sub>9</sub> Y <sub>0.84</sub> Zn |
| Formula weight (g·mol <sup>-1</sup> )                                | 1158.28                                                                                | 1158.28                                                                                | 1147.74                                                                                | 1096.46                                                                                                                   |
| $\lambda$ (Å)                                                        | 0.71073                                                                                | 0.71073                                                                                | 1.54180                                                                                | 0.71073                                                                                                                   |
| Temperature (K)                                                      | 100                                                                                    | 100                                                                                    | 100                                                                                    | 110                                                                                                                       |
| Crystal system                                                       | Orthorhombic                                                                           | Orthorhombic                                                                           | Orthorhombic                                                                           | Orthorhombic                                                                                                              |
| Space group                                                          | <i>P</i> 2 <sub>1</sub> 2 <sub>1</sub> 2 <sub>1</sub>                                                                     |
| <i>a</i> (Å)                                                         | 13.0607(9)                                                                             | 13.0364(7)                                                                             | 13.0430(2)                                                                             | 13.0472(5)                                                                                                                |
| <i>b</i> (Å)                                                         | 18.8726(11)                                                                            | 18.8572(11)                                                                            | 18.9020(2)                                                                             | 18.8726(7)                                                                                                                |
| <i>c</i> (Å)                                                         | 19.3077(13)                                                                            | 19.2842(11)                                                                            | 19.3871(2)                                                                             | 19.2735(9)                                                                                                                |
| Volume (Å <sup>3</sup> )                                             | 4759.1(5)                                                                              | 4740.6(3)                                                                              | 4779.7(1)                                                                              | 4745.8(3)                                                                                                                 |
| <i>Z</i>                                                             | 4                                                                                      | 4                                                                                      | 4                                                                                      | 4                                                                                                                         |
| Calc. Density (g·cm <sup>-3</sup> )                                  | 1.616                                                                                  | 1.623                                                                                  | 1.595                                                                                  | 1.534                                                                                                                     |
| Absorption coefficient (mm <sup>-1</sup> )                           | 2.197                                                                                  | 2.206                                                                                  | 11.111                                                                                 | 1.913                                                                                                                     |
| Theta range for data collection (°)                                  | 1.8-35.7                                                                               | 2.1-32.9                                                                               | 3.3-70.4                                                                               | 1.5-30.6                                                                                                                  |
| Reflections collected                                                | 115603                                                                                 | 159374                                                                                 | 37407                                                                                  | 169605                                                                                                                    |
| Independent reflections                                              | 18888                                                                                  | 16609                                                                                  | 9170                                                                                   | 14355                                                                                                                     |
| <i>R</i> (int)                                                       | 0.028                                                                                  | 0.034                                                                                  | 0.033                                                                                  | 0.044                                                                                                                     |
| Data/restraints/parameters                                           | 17290/0/596                                                                            | 15792/0/596                                                                            | 8868/0/596                                                                             | 9542/1/596                                                                                                                |
| Goodness-of-fit                                                      | 1.09                                                                                   | 1.08                                                                                   | 1.09                                                                                   | 0.97                                                                                                                      |
| Refinement on                                                        | F                                                                                      | F                                                                                      | F                                                                                      | F <sup>2</sup>                                                                                                            |
| Final <i>R</i> indices [ <i>I</i> > <i>n</i> $\sigma$ ( <i>I</i> )]  | 0.0150 (n=3)                                                                           | 0.0125 (n=3)                                                                           | 0.0192 (n=3)                                                                           | 0.0163 (n=2)                                                                                                              |
| Final <i>wR</i> indices [ <i>I</i> > <i>n</i> $\sigma$ ( <i>I</i> )] | 0.0152 (n=3)                                                                           | 0.0131 (n=3)                                                                           | 0.0228 (n=3)                                                                           | 0.0433 (n=2)                                                                                                              |
| Flack parameter, nb Friedel-pairs                                    | -0.015(2), 8300                                                                        | -0.009(2), 7333                                                                        | -0.0135(8), 4090                                                                       | -0.014(2), 6445                                                                                                           |
| Largest diff. Peak and hole (e Å <sup>-3</sup> )                     | 0.97/-0.91                                                                             | 0.45/-0.46                                                                             | 3.31/-2.99                                                                             | 0.38/-0.19                                                                                                                |
| CCDC reference number                                                | 2007105                                                                                | 2007104                                                                                | 2018680                                                                                | 2033959                                                                                                                   |

**Figure S1.** Asymmetric units for  $\Delta$ -Dy and  $\Delta$ -Dy with numbering scheme.

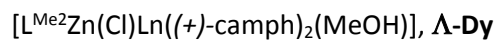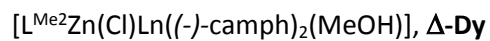

ORTEP view (with ellipsoids at the 50% level of probability) of the asymmetric unit

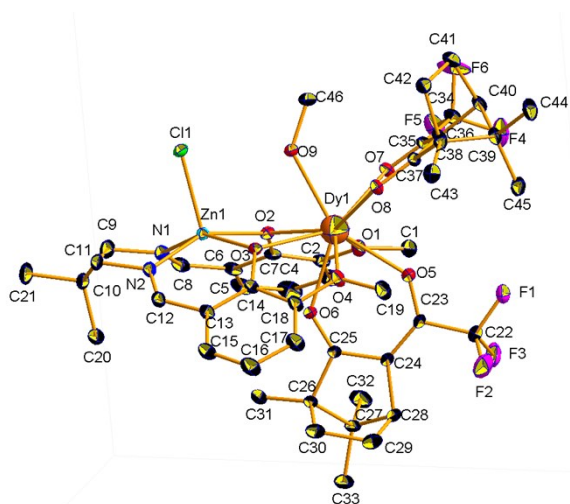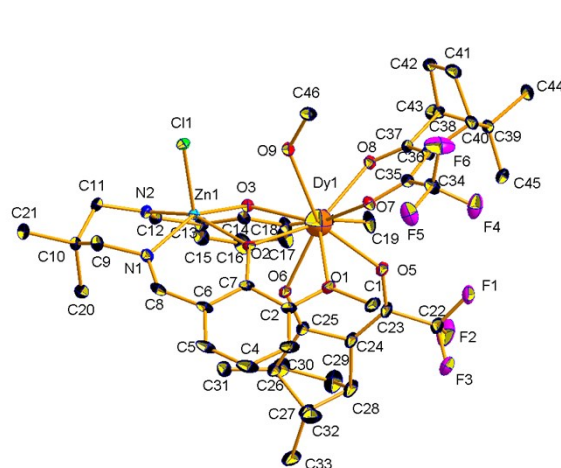

view illustrating the mirror-image relationship of the complexes.

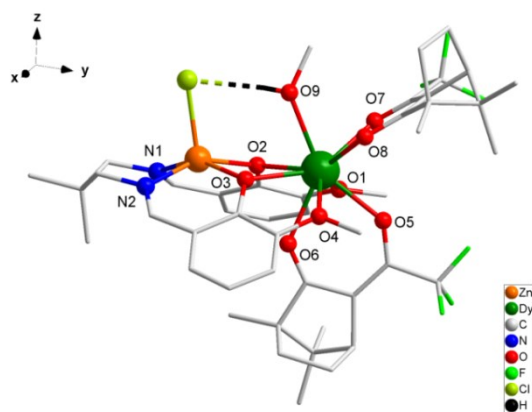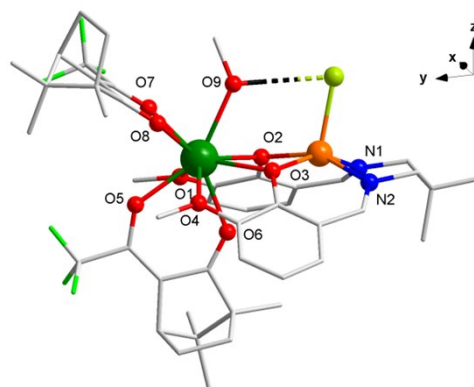

**Figure S2.**  $\Lambda$ -Eu : ORTEP plot (with ellipsoids at the 50% level of probability) of the asymmetric unit with numbering scheme.

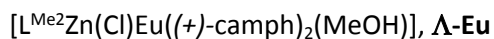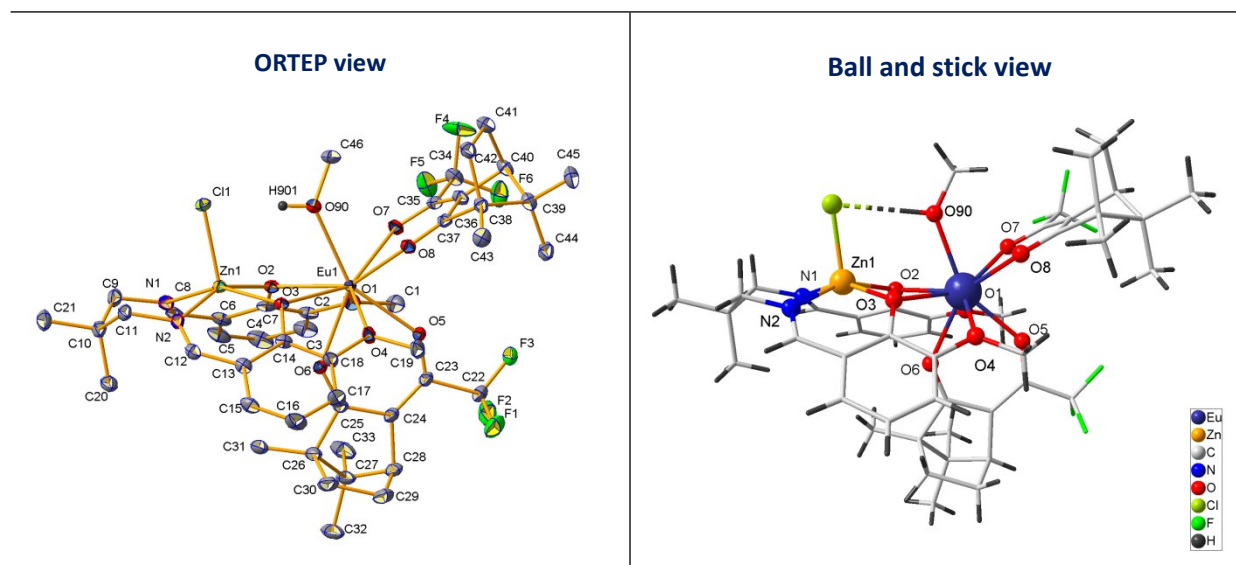

**Figure S3.**  $\Lambda$ -Dy/Y : ORTEP plot (with ellipsoids at the 50% level of probability) of the asymmetric unit with numbering scheme.

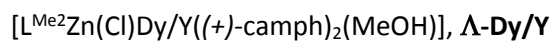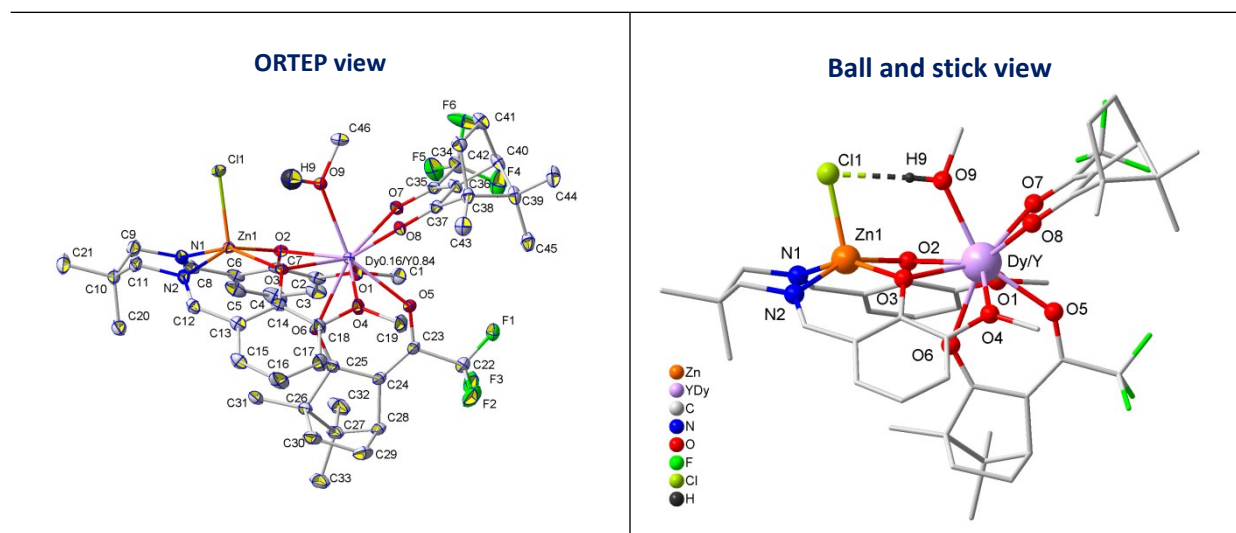

**Table S2.** Selected bond distances (Å) and angles (°) for  $\Delta$ - and  $\Lambda$ -Dy,  $\Lambda$ -Eu, and  $\Lambda$ -Dy/Y complexes.

|     |     | $\Lambda$ -Dy | $\Delta$ -Dy | $\Lambda$ -Eu | $\Lambda$ -Dy/Y |          |
|-----|-----|---------------|--------------|---------------|-----------------|----------|
| Zn1 | N2  | 2.071(1)      | 2.0674(9)    | 2.068(2)      | 2.067(1)        |          |
|     | O2  | 2.0813(8)     | 2.0773(8)    | 2.081(1)      | 2.080(1)        |          |
|     | N1  | 2.086(1)      | 2.084(1)     | 2.0875(2)     | 2.086(1)        |          |
|     | O3  | 2.0907(8)     | 2.0904(6)    | 2.091(1)      | 2.091(1)        |          |
|     | Cl1 | 2.3116(3)     | 2.3091(3)    | 2.3077(5)     | 2.3087(4)       |          |
| Dy1 | O5  | 2.323(1)      | 2.3214(8)    | 2.352(1)      | 2.308(1)        |          |
|     | O7  | 2.3362(9)     | 2.3314(8)    | 2.378(1)      | 2.324(1)        |          |
|     | O6  | 2.3556(8)     | 2.3529(8)    | 2.395(1)      | 2.350(1)        |          |
|     | O2  | 2.4069(8)     | 2.4038(8)    | 2.438(1)      | 2.395(1)        |          |
|     | O8  | 2.407(1)      | 2.4063(8)    | 2.447(1)      | 2.356(1)        |          |
|     | O3  | 2.4243(8)     | 2.4231(6)    | 2.4565(1)     | 2.4114(9)       |          |
|     | O9  | 2.440(1)      | 2.4375(8)    | 2.468(1)      | 2.420(1)        |          |
|     | O4  | 2.5370(9)     | 2.5330(8)    | 2.550 (1)     | 2.524(1)        |          |
|     | O1  | 2.5583(9)     | 2.5536(8)    | 2.568(1)      | 2.548(1)        |          |
| C1  | O1  | 1.435(2)      | 1.433(2)     | 1.435(2)      | 1.434(2)        |          |
| C2  | O1  | 1.374(2)      | 1.373(1)     | 1.377(3)      | 1.381(2)        |          |
| C7  | O2  | 1.326(1)      | 1.324(1)     | 1.327(2)      | 1.328(2)        |          |
| C14 | O3  | 1.325(1)      | 1.322(1)     | 1.324(2)      | 1.325(2)        |          |
| C18 | O4  | 1.375(2)      | 1.375(1)     | 1.377(2)      | 1.380(2)        |          |
| C19 | O4  | 1.438(2)      | 1.436(1)     | 1.439(2)      | 1.442(2)        |          |
| C23 | O5  | 1.280(2)      | 1.280(1)     | 1.277(2)      | 1.281(2)        |          |
| C25 | O6  | 1.242(1)      | 1.238(1)     | 1.239(2)      | 1.239(2)        |          |
| C35 | O7  | 1.273(2)      | 1.274(1)     | 1.274(2)      | 1.276(2)        |          |
| C37 | O8  | 1.246(2)      | 1.245(1)     | 1.244(2)      | 1.245(2)        |          |
| C46 | O9  | 1.431(2)      | 1.428(1)     | 1.432(2)      | 1.429(2)        |          |
| Cl1 | O9  | 3.022(1)      | 3.0219(8)    | 3.025(1)      | 3.022(1)        |          |
| Cl1 | H9  | 2.2273(3)     | 2.1898(3)    | 2.1764(4)     | 2.1600(4)       |          |
| O2  | Zn1 | O3            | 80.49(3)     | 67.77(3)      | 80.95(5)        | 80.22(4) |
| O2  | Dy1 | O3            | 80.49(3)     | 67.83(3)      | 67.20(4)        | 67.98(3) |

---

**Table S3:** SHAPE Analysis for the ML9 coordination sphere of the Ln ions.<sup>1</sup>

CSAPR-9                      Spherical capped square antiprism  
MFF-9                              Muffin

| [ML9]           | CSAPR-9<br>( $C_{4v}$ ) | MFF-9<br>(Cs) |
|-----------------|-------------------------|---------------|
| $\Delta$ -Dy    | 1.396                   | <b>1.391</b>  |
| $\Lambda$ -Dy   | 1.399                   | <b>1.398</b>  |
| $\Lambda$ -Dy/Y | <b>1.356</b>            | 1.357         |
| $\Lambda$ -Eu   | 1.545                   | <b>1.457</b>  |

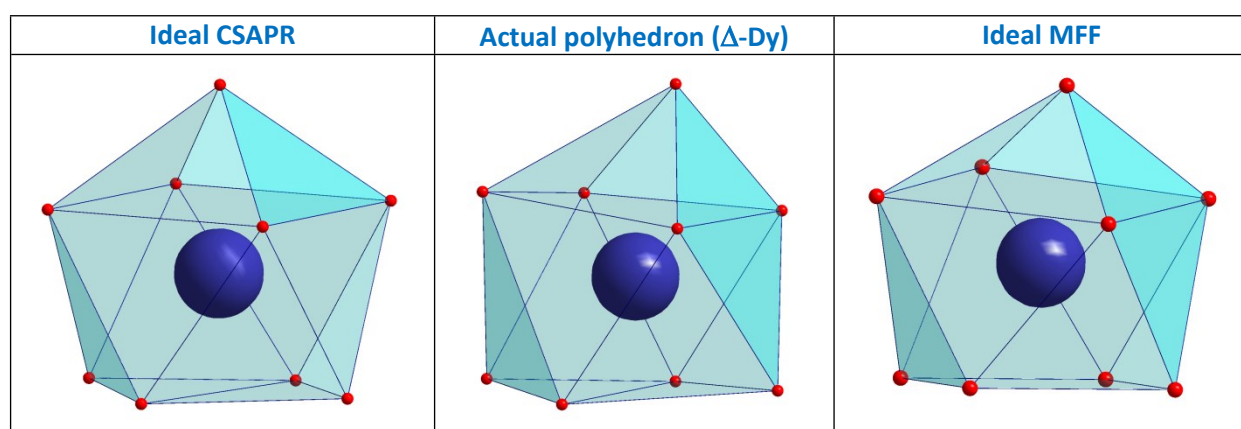

**Figure S4.** Solid-state UV-vis spectra for  $ZnL^{Me_2}$  and  $[L^{Me_2}Zn(Cl)Dy(+/-)camph)_2(MeOH)]$  complexes.

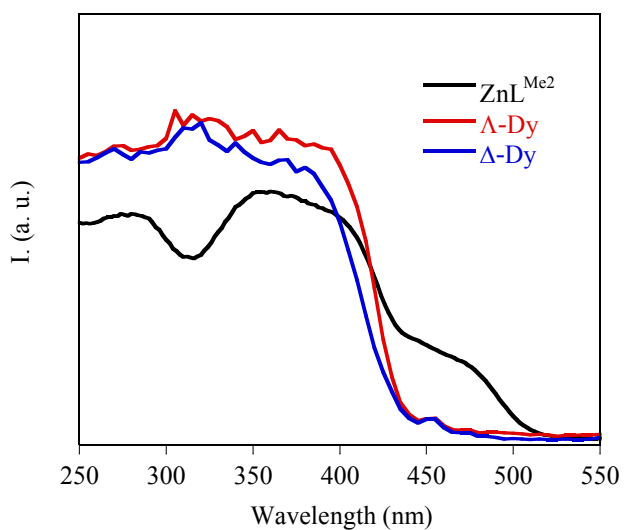

<sup>1</sup> Llunell, M.; Casanova, D.; Cirera, J.; Alemany, P.; Alvarez, S.; SHAPE: Program for the stereochemical analysis of molecular fragments by means of continuous shape measures and associated tools 2.1 ed.; University of Barcelona: Barcelona, 2013.

**Figure S5.** Magnetic behaviors for **Dy** complex.

Magnetic behavior is independent of the chirality therefore a full set of magnetic behavior has been collected only for  $\Lambda$ -**Dy**. The magnetic purity of the  $\Delta$  enantiomer was confirmed by susceptibility values at 300 K (found  $\chi_M T = 14.10 \text{ cm}^3 \text{ mol}^{-1} \text{ K}$ ) and AC versus  $T$  trace with frequency of 1 kHz (shown below) that was found identical to  $\Lambda$ -**Dy**.

**DC studies:** The temperature dependence of  $\chi_M T$  for  $\Lambda$ -**Dy** (Fig. S5a) is in agreement with the behavior expected for an isolated Dy(III) ion. The value found at 300 K is  $14.15 \text{ cm}^3 \text{ mol}^{-1} \text{ K}$  and reaches  $11.41 \text{ cm}^3 \text{ mol}^{-1} \text{ K}$  at 4 K. Magnetization versus field at 2 K (b) reaches as value of  $5.35 \mu_B$  under 5 T.

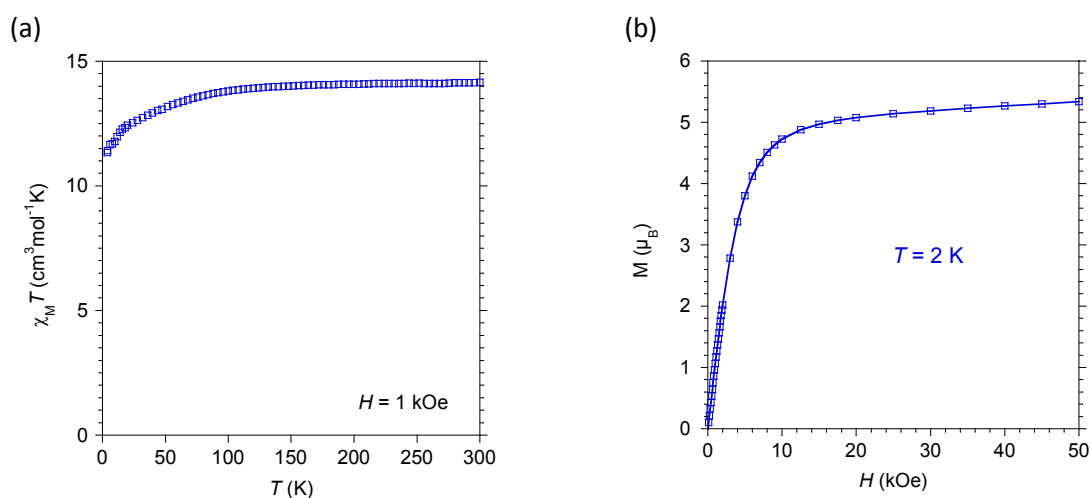

**AC studies:** AC magnetic susceptibility as a function of temperature recorded without an applied field is shown in (c). An out-of-phase component,  $\chi_M''$ , was found below 15 K and lower temperature behavior indicated other relaxation processes become active. Application of an external DC field allowed to drastically reduce these contributions but not to fully cancel them even when a field of 3 kOe (d). Since the  $\chi_M'' = f(T)$  for different AC frequencies obtained with  $H_{DC} = 1 \text{ kOe}$  display well defined maxima, a full data set was collected (e). The temperature dependence of the relaxation time between 3.8 and 10 K (f) was obtained by analyzing the  $\chi_M'' = f(\nu)$  for different temperatures with an extended Debye model. The linear variation of  $\tau = f(1/T)$  between 10 and 6.5 K was fitted assuming a thermally activated process yielding  $U_{eff}/k_B = 42 \text{ K}$  with  $\tau_0 = 1.4 \times 10^{-6} \text{ s}$  (dotted blue line). A modelling over the entire temperature range (3.8 to 10 K, red line) was possible considering contributions from the Orbach and Raman relaxation processes ( $\tau = \tau_0 e^{U_{eff}/kT} + 1/(RT^n)$ ). The values of the adjustment parameters are  $U_{eff}/k_B = 53 \pm 9 \text{ K}$ ,  $\tau_0 = 0.8 \pm 2 \times 10^{-8} \text{ s}$ ,  $R = 0.2 \pm 0.1 \text{ s}^{-1}$ ,  $n = 4.9 \pm 0.4$ .

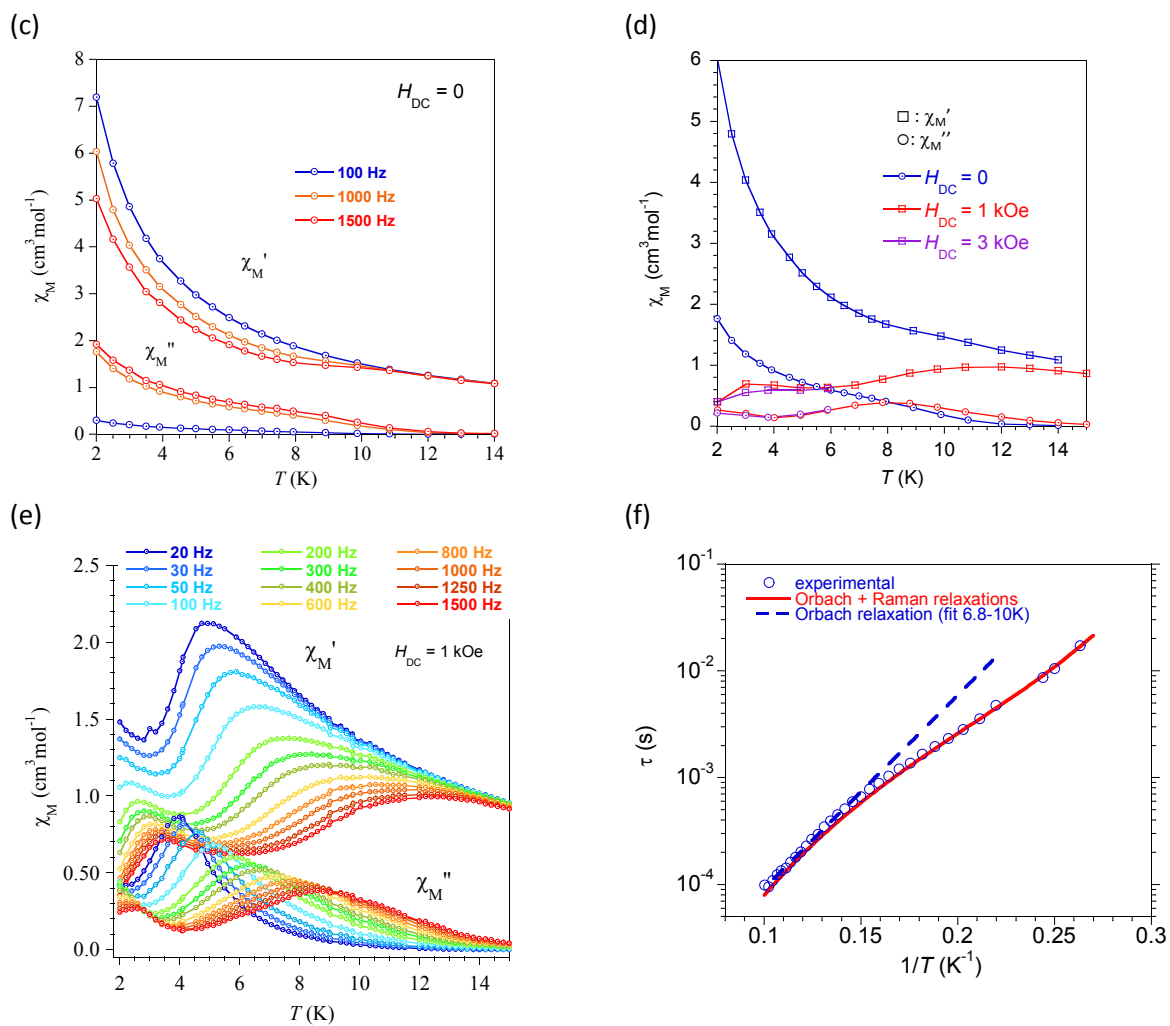

Figure S5g shows the  $\chi_M'' = f(T)$  trace for  $\Delta$ -Dy under  $H_{DC} = 1$  kOe and for  $\nu = 1$  kHz which confirms a behavior identical to that of the  $\Lambda$ -Dy enantiomer.

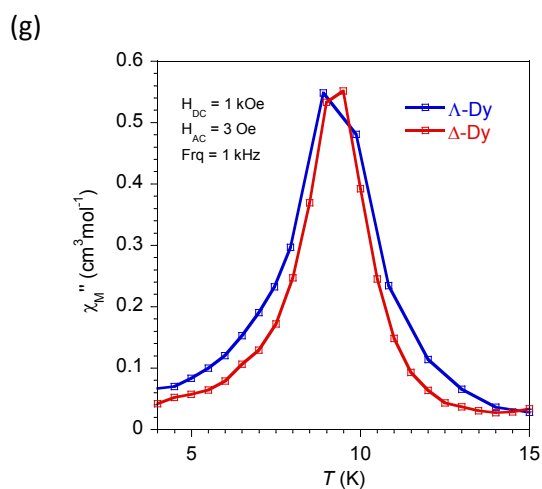



**Figure S6.** Magnetic behaviors for  $[L^{Me_2Zn}(Cl)Y/Dy((+)-camph)_2(MeOH)]$ ,  $\Lambda$ -Dy/Y.

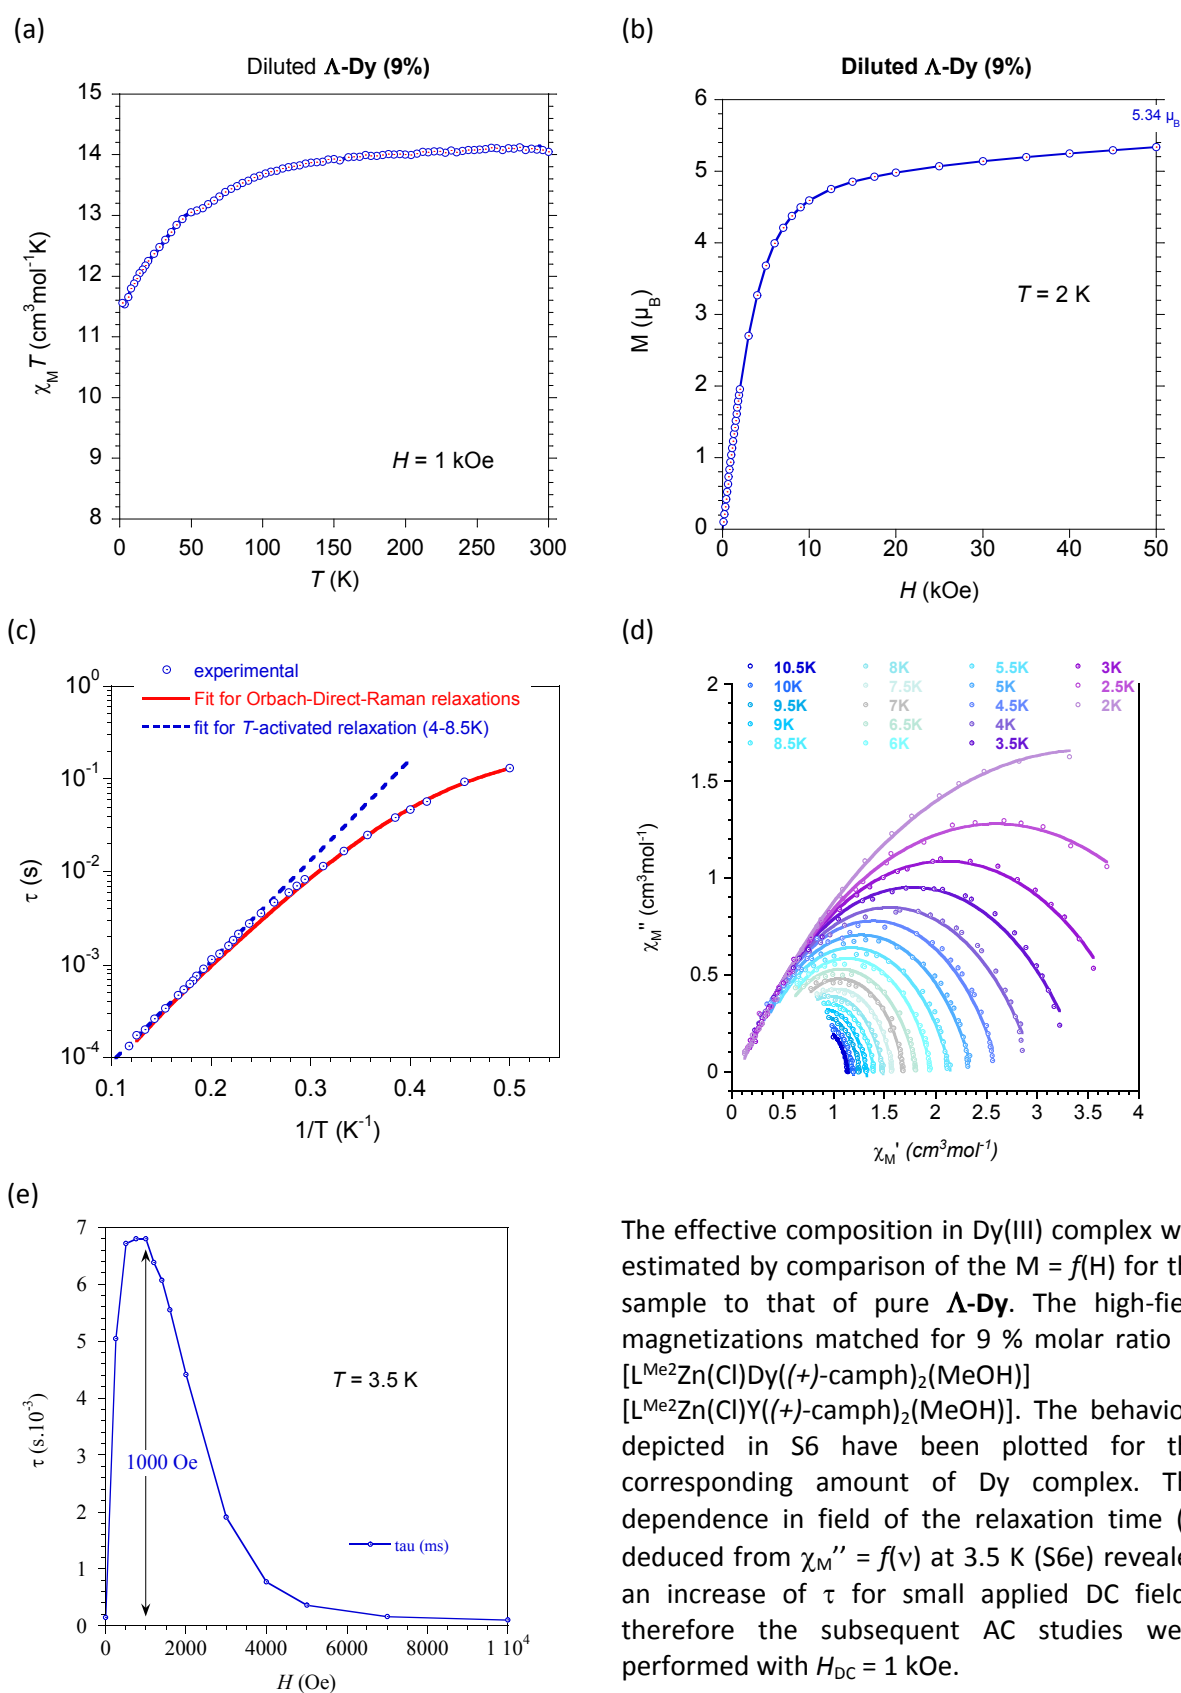

The effective composition in Dy(III) complex was estimated by comparison of the  $M = f(H)$  for the sample to that of pure  $\Lambda$ -Dy. The high-field magnetizations matched for 9 % molar ratio of  $[L^{Me_2Zn}(Cl)Dy((+)-camph)_2(MeOH)]$  in  $[L^{Me_2Zn}(Cl)Y((+)-camph)_2(MeOH)]$ . The behaviors depicted in S6 have been plotted for the corresponding amount of Dy complex. The dependence in field of the relaxation time ( $\tau$ ) deduced from  $\chi_M'' = f(v)$  at 3.5 K (S6e) revealed an increase of  $\tau$  for small applied DC fields; therefore the subsequent AC studies were performed with  $H_{DC} = 1$  kOe.

**Picture 2:** Crystals (size 300-800  $\mu\text{m}$ ) and powders (crushed crystal) on the cold stage for micro-photoluminescence studies.

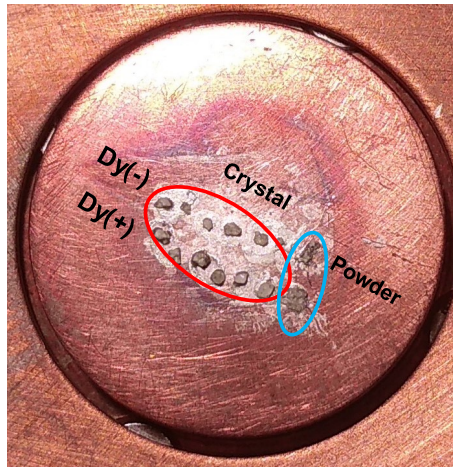

**Figure S7.** (a) Temperature dependent emission of a  $\Delta$ -Dy crystal. Blue lines: left-handed circular (LHC) polarization; red lines: right-handed circular (RHL) polarization. (b) Temperature dependence of the deduced dissymmetry factor  $g_{lum}$ .

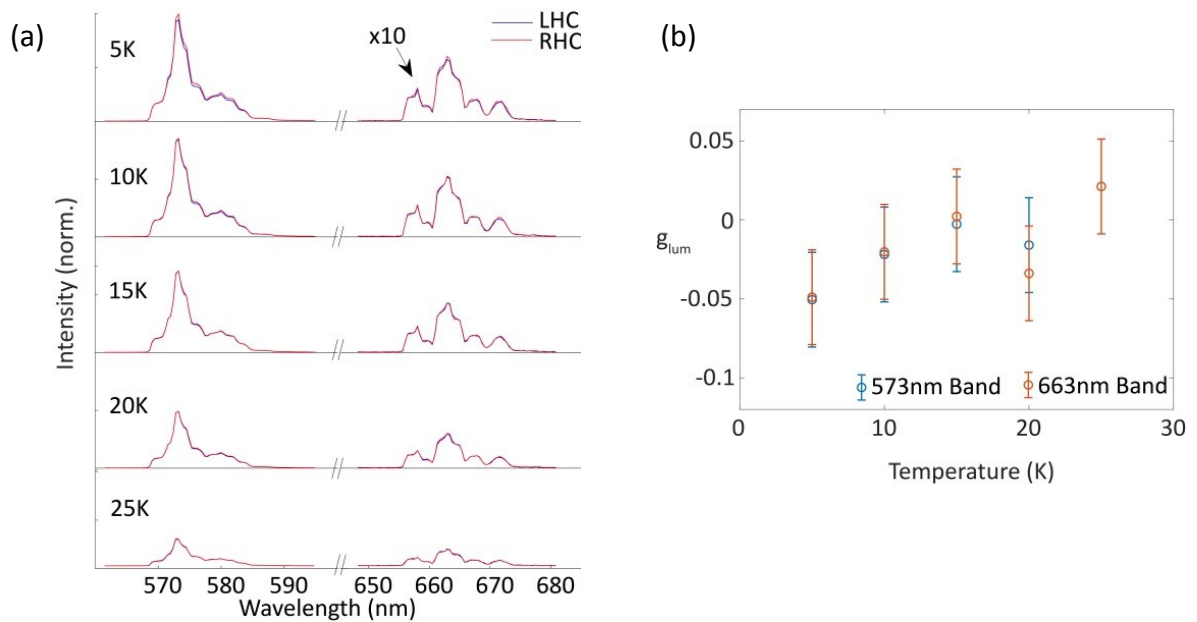

**Figure S8.** Temperature dependent emission and  $g_{lum}$  for a  $\Lambda$ -Eu (a, b), and a  $\Delta$ -Eu (c, d) crystal (blue lines: left-handed circular (LHC) polarization; red lines: right-handed circular (RHL) polarization); (e) emission spectrum at 5 K ( $\Delta$ -Eu).

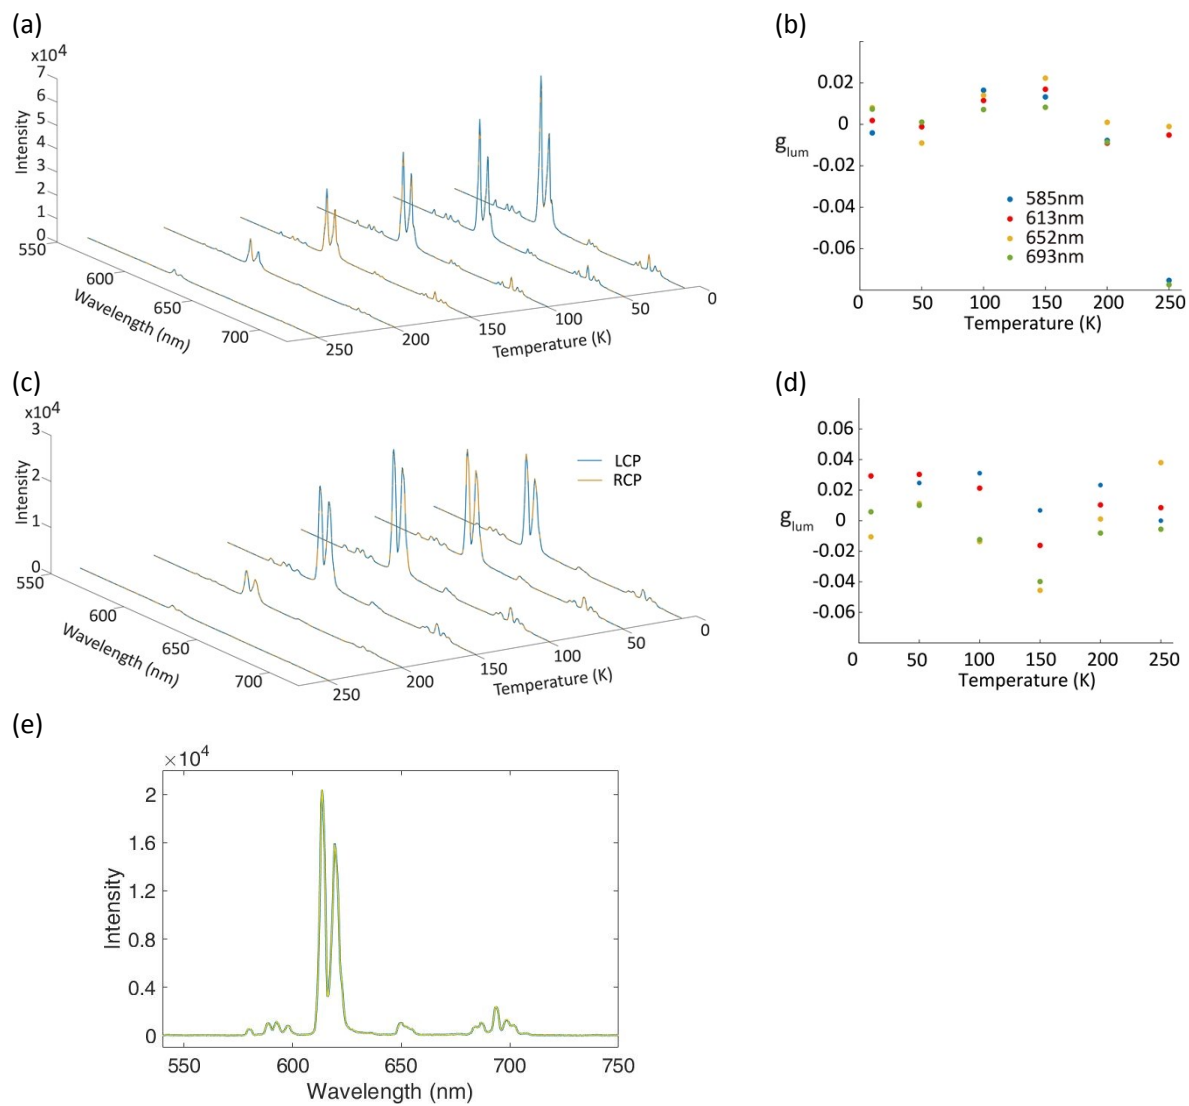

**Figure S9.** Angular distribution of the emission (bands at 573-nm and 663-nm) recorded at 5K, and temperature dependent variation of the dissymmetry factor  $g_{lum}$  for a crystalline powder of (left)  $\Lambda$ -Dy and (right) a  $\Delta$ -Dy crystal. The grey portions correspond to the angles not collected by the objective (outside the numerical aperture).

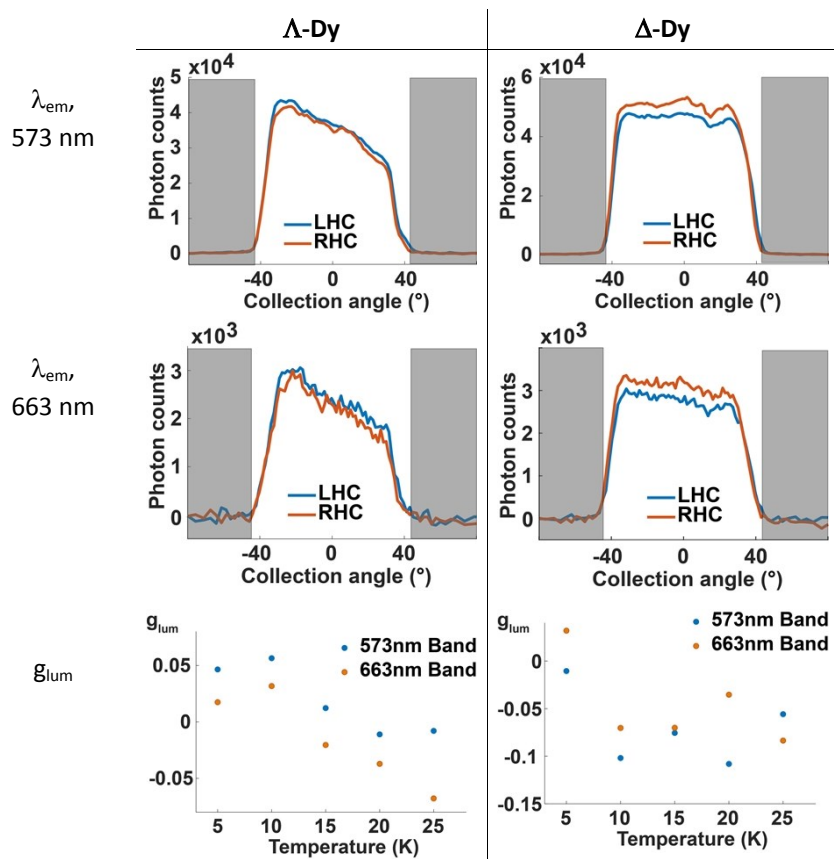

**Figure S10.** X-Ray Powder Diffraction (XRPD) at 295 K for  $\Lambda$ -Dy,  $\Delta$ -Dy,  $\Lambda$ -Eu, and  $\Delta$ -Eu.

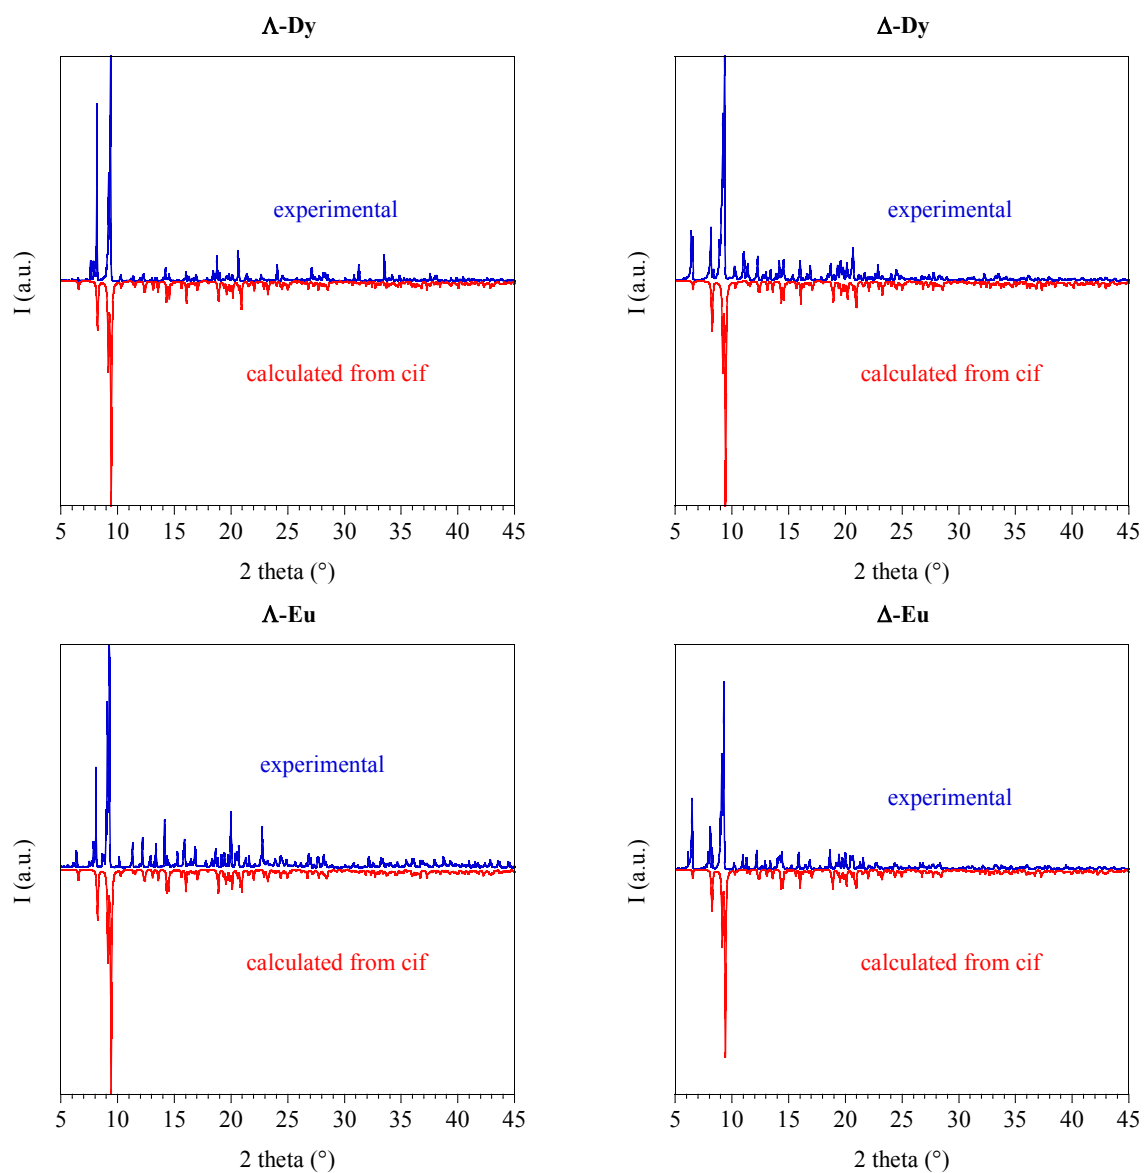

Supplement: d0qi00919a1.pdf [file d0qi00919a1.pdf]
